# Supplementary material for: Decision Support System version 1.0 (DSS v1.0) for air quality management in Delhi, India
Source: Copernicus journal article supplement (doi:10.5194/gmd-2022-300), 2023-04-12
Supplement: Supplementary file 1 [file gmd-2022-300-supplement.pdf]

## **Decision Support System (v 1.0) for Air Quality Management in New Delhi, India**

Gaurav Govardhan<sup>1,2,\*</sup>, Sachin D. Ghude<sup>1,\*</sup>, Rajesh Kumar<sup>3</sup>, Sumit Sharma<sup>4</sup>, Preeti Gunwani<sup>5</sup>, Chinmay Jena<sup>5</sup>, Shubhangi Ingle<sup>1</sup>, Prafull Yadav<sup>1</sup>, Sreyashi Debnath<sup>1,6</sup>, Pooja Pawar<sup>1</sup>, Prodip Acharja<sup>1,6</sup>, Rajmal Jat<sup>1</sup>, Gayatry Kalita<sup>1</sup>, Rupal Ambulkar<sup>1</sup>, Santosh Kulkarni<sup>7</sup>, Akshara Kagainalkar<sup>7</sup>, Vijay K Soni<sup>5</sup>, Ravi S. Nanjundiah<sup>8,9</sup>, and M. Rajeevan<sup>10</sup>

- 1: Indian Institute of Tropical Meteorology, Ministry of Earth Sciences, Pune, Maharashtra, India
- 2: National Centre for Medium-Range Weather Forecasting, Ministry of Earth Sciences, Noida, Uttar Pradesh, India
- 3: National Center for Atmospheric Research, Boulder, CO, United States of America
- 4: The Energy and Resources Institute, Delhi, India
- 5: India Meteorology Department, Ministry of Earth Sciences, Delhi, India
- 6: Savitribai Phule Pune University, Pune, Maharashtra, India
- 7: Centre for Development of Advanced Computing, Pune, Maharashtra, India
- 8: Centre for Atmospheric and Oceanic Sciences, Indian Institute of Science, Bengaluru, India.
- 9: Divecha Centre for Climate Change, Indian Institute of Science, Bengaluru, India.
- 10: National Centre for Earth Science Studies, Thiruvananthapuram, Kerala, India.

\* : corresponding authors:

Gaurav Govardhan: [gaurav.govardhan@tropmet.res.in](mailto:gaurav.govardhan@tropmet.res.in) ,

Sachin D. Ghude: [sachinghude@tropmet.res.in](mailto:sachinghude@tropmet.res.in)

### **Supplementary material**

**Text S1:S5**

**Figures: S1:S3**

## 1. Domain details

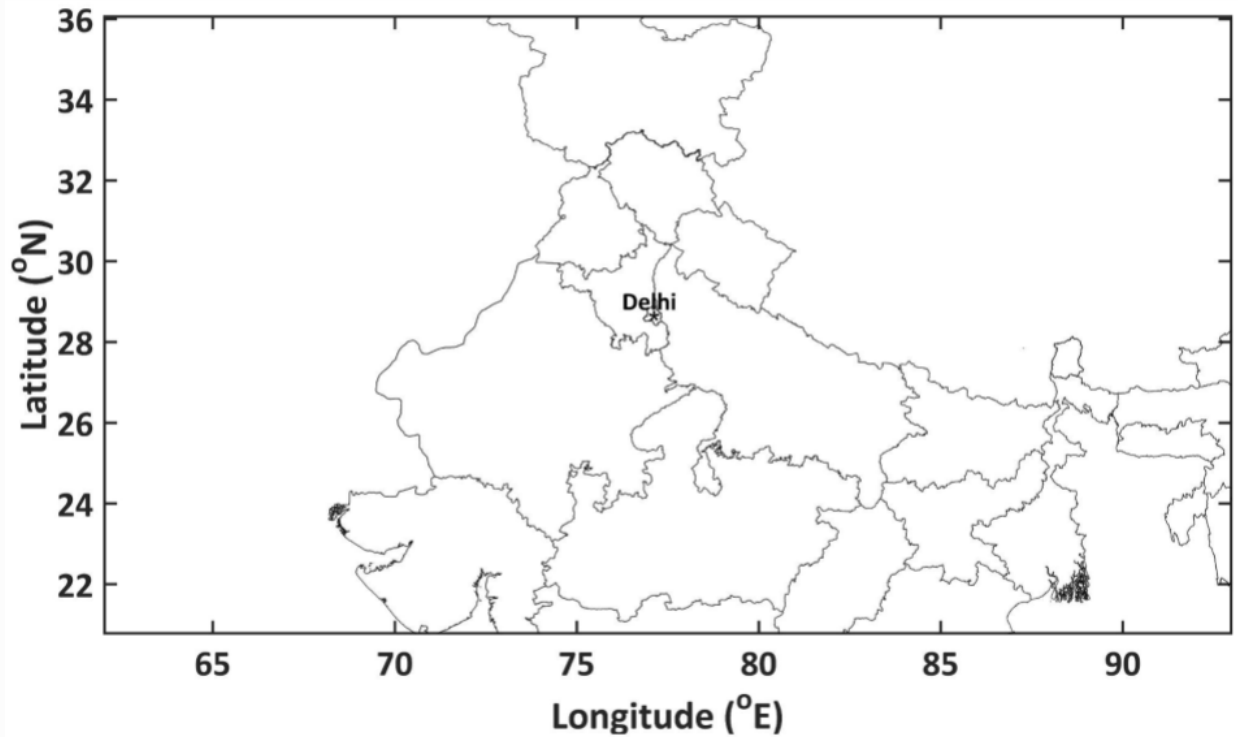

Supplementary figure 1: The model domain used for DSS. The location of Delhi has been identified.

## 2. Comparison between DSS simulated air quality index and that derived from the corresponding measurements:

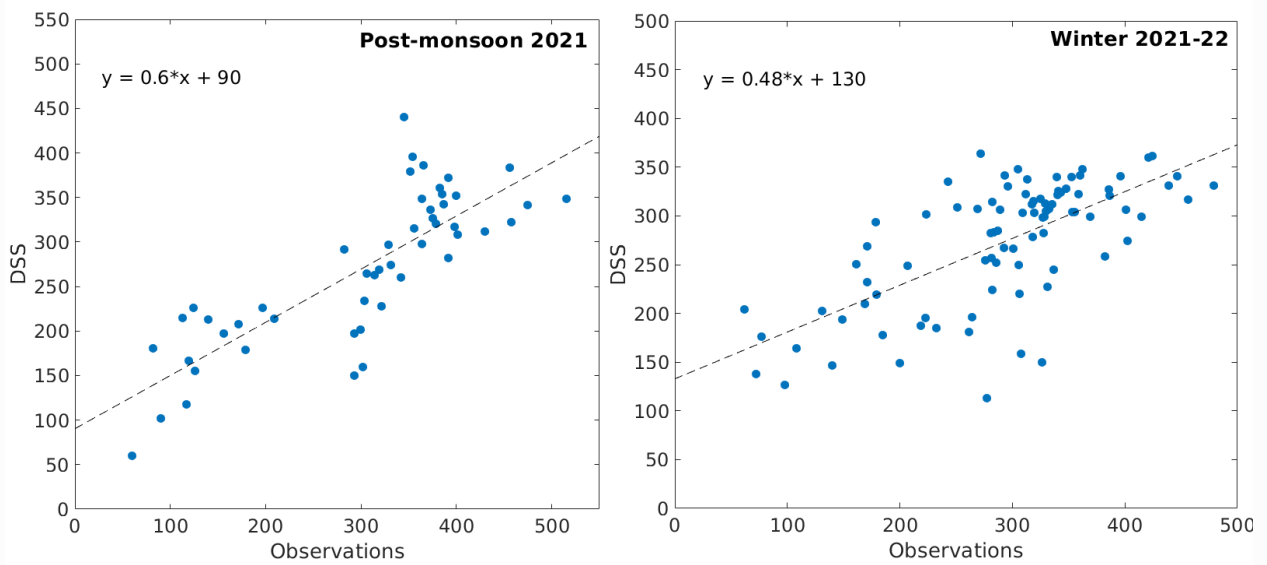

**Supplementary figure 2:** Comparison between DSS simulated air quality index (AQI) for PM<sub>2.5</sub> and the corresponding AQI calculated from the station measurements averaged over Delhi for both the seasons. The black-colored dotted line represents the best fit, and the equation for the best-fit line is written in the top left corner of each panel.

### 3. Formulae for statistical parameters for evaluating model-simulated PM<sub>2.5</sub> mass concentration

M = predicted concentration

O = observed concentration

n = sample size (number of hours or number of days)

$$1. \text{ Mean Bias} = (1/n) \times \sum_1^n (M - O)$$

$$2. \text{ Mean Error} = (1/n) \times \sum_1^n |(M - O)|$$

$$3. \text{ Root Mean Square Error} = \sqrt{((\sum_1^n (M - O)^2)/n)}$$

$$4. \text{ Normalized Mean Bias} = \frac{\sum_1^n (M-O)}{\sum_1^n O}$$

$$5. \text{ Normalized Mean Error} = \frac{\sum_1^n |(M-O)|}{\sum_1^n O}$$

$$6. \text{ Fractional Bias} = \left(\frac{1}{n}\right) \times \frac{\sum_1^n (M-O)}{\sum_1^n \frac{(M+O)}{2}}$$

$$7. \text{ Fractional Error} = \left(\frac{1}{n}\right) \times \frac{\sum_1^n |(M-O)|}{\sum_1^n \frac{(M+O)}{2}}$$

#### 4. Contingency table and the formulae used for the calculation of statistical parameters

Considering all the entries in the observations and the forecasts we can compute the values of a,b,c, and d by using the following contingency table. Using those values, we can compute the required statistical parameters listed below.

|          |     | Observations |    |
|----------|-----|--------------|----|
|          |     | Yes          | No |
| Forecast | Yes | a            | b  |
|          | No  | c            | d  |

| Statistic name                                         | Interpretation                                                                                                           | Formula                     | unit | Ideal value |
|--------------------------------------------------------|--------------------------------------------------------------------------------------------------------------------------|-----------------------------|------|-------------|
| Accuracy (A)                                           | Ability of the forecast to predict events and non-events                                                                 | $A = (a+d)/(a+b+c+d) * 100$ | %    | 100         |
| False Alarm Rate (FAR)                                 | The tendency of the model to give an incorrect forecast of a non-event                                                   | $FAR = (b/(a+b)) * 100$     | %    | 0           |
| Probability of Detection (POD) or Hit rate             | The ability of the model to give a correct forecast of an event                                                          | $POD = (a/(a+c)) * 100$     | %    | 100         |
| Critical Success Index (CSI), also called Threat Score | The ability of the model in correctly predicting the event when the event exists either in forecasts or in observations. | $CSI = (a/(a+b+c)) * 100$   | %    | 100         |
| Success Ratio                                          | Success rate for the forecasts                                                                                           | $SR = 100 - FAR$            | %    | 100         |

|      |                                                                                                                                                       |               |   |   |
|------|-------------------------------------------------------------------------------------------------------------------------------------------------------|---------------|---|---|
| Bias | Ratio of the tendency of getting a false forecast for a non-event from the model to that of getting a false forecast for an event from the same model | Bias = POD/SR | - | 1 |
|------|-------------------------------------------------------------------------------------------------------------------------------------------------------|---------------|---|---|

**5. Effects of a 20% reduction in emissions from Delhi's transport sector and Jhajjar districts on PM<sub>2.5</sub> mass concentrations in Delhi during the study period:**

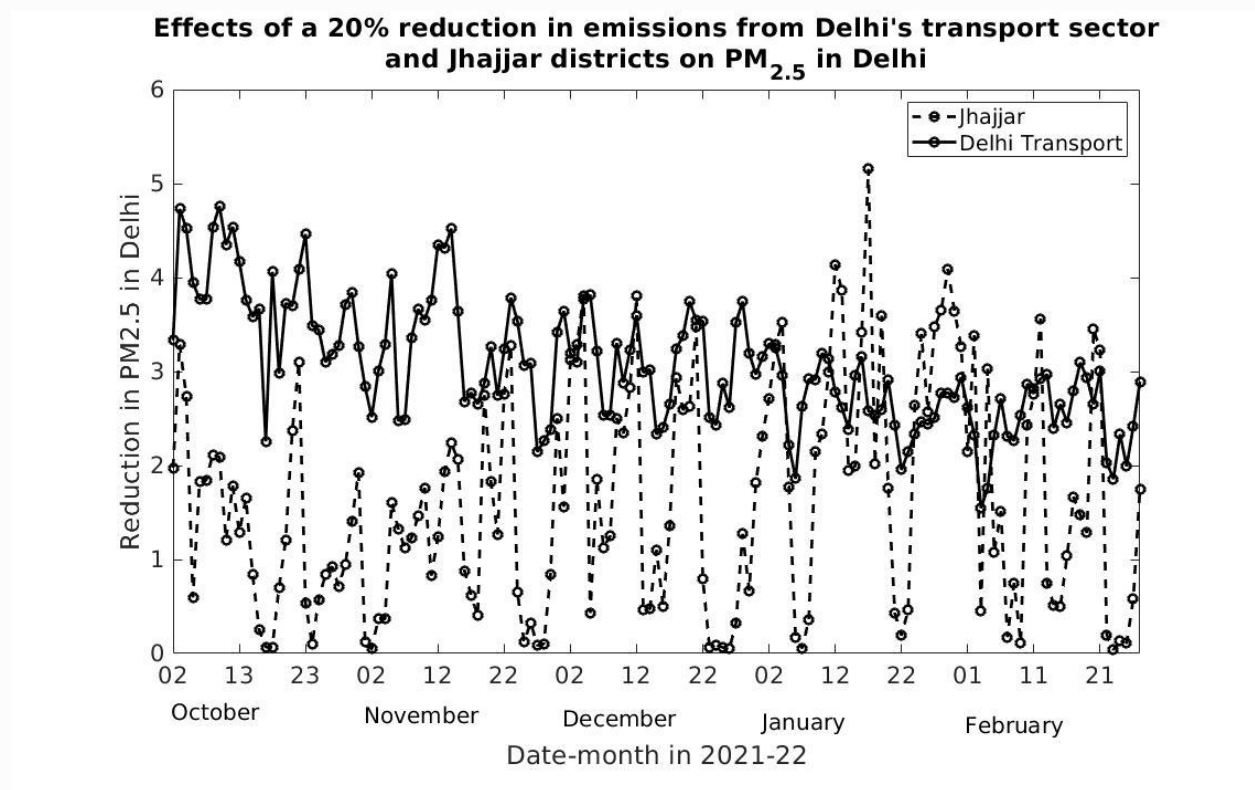

**Supplementary figure 5:** Simulated effects of a 20% reduction in emissions from Delhi's transport sector and Jhajjar districts on PM<sub>2.5</sub> in Delhi during October 2021 - February 2022 period.
